# Supplementary material
Source: PubMed Central journal article supplement (PMC2944769)
Supplement: NIHMS233820-supplement-01.pdf [file NIHMS233820-supplement-01.pdf]

**Supplemental Table 1.** Manual muscle testing results in nine *DMD* manifesting carriers.

Subjects in the UDP undergo a standardized physical examination based on the original Clinical Investigation in Duchenne Dystrophy protocols (Brooke MH *et al*, Muscle Nerve 1983;6:91-103). This includes manual motor testing (MMT) in which the evaluator performs strength testing of 34 individual muscle groups and gives a 0-5 score based on the modified Medical Research Council (mMRC) scale. The mMRC scale is converted within the database to a 0-10 integral scale for analysis, and an average score is generated from all the examined muscle groups. Details of testing are available on the UDP website (<http://dystrophy.genetics.utah.edu>). Some subjects were included in the UDP database but have not undergone standardized examination; for these subjects no mMRC values are reported. These values represent data combined from individuals in differing stages of disease progression over a wide range of clinical severity, but nevertheless they demonstrate a predicted pattern of proximal greater than distal weakness.

n/a = not applicable; SD = standard deviation.

| Muscle group                      | Across-individual mean mMRC (SD) | Mean (SD) intra-individual right-left difference in mMRC scale |
|-----------------------------------|----------------------------------|----------------------------------------------------------------|
| <b>Neck:</b>                      |                                  |                                                                |
| <i>Neck Flexion</i>               | 7.10 (3.00)                      | n/a                                                            |
| <i>Neck Extension</i>             | 8.44 (2.55)                      | n/a                                                            |
| <b>Upper extremity:</b>           |                                  |                                                                |
| <i>Shoulder Abduction</i>         | 8.28 (1.90)                      | 0.61 (1.53)                                                    |
| <i>Shoulder External Rotation</i> | 8.06 (2.84)                      | 0.83 (1.62)                                                    |
| <i>Elbow Flexion</i>              | 8.33 (2.11)                      | 0.67 (1.20)                                                    |
| <i>Elbow Extension</i>            | 8.33 (2.70)                      | 0.89 (2.48)                                                    |
| <i>Wrist Extension</i>            | 9.11 (1.23)                      | 0.07 (0.22)                                                    |
| <i>Wrist Flexion</i>              | 9.11 (1.08)                      | 0.28 (0.51)                                                    |
| <i>Thumb Abduction</i>            | 8.50 (1.38)                      | 0.41 (0.55)                                                    |
| Mean (SD) for upper extremities:  | 8.54 (1.97)                      | 0.54 (1.33)                                                    |
| <b>Lower extremity:</b>           |                                  |                                                                |
| <i>Hip Flexion</i>                | 6.25 (3.00)                      | 0.29 (0.45)                                                    |
| <i>Hip Extension</i>              | 6.44 (3.41)                      | 0.09 (0.19)                                                    |
| <i>Hip Abduction</i>              | 5.72 (3.06)                      | 0.09 (0.19)                                                    |
| <i>Knee Extension</i>             | 7.56 (3.03)                      | 0.44 (1.33)                                                    |
| <i>Knee Flexion</i>               | 7.69 (2.47)                      | 0.04 (0.11)                                                    |
| <i>Ankle Dorsiflexion</i>         | 8.61 (1.46)                      | 0.39 (0.60)                                                    |
| <i>Ankle Inversion</i>            | 9.33 (1.28)                      | 0.06 (0.17)                                                    |
| <i>Ankle Eversion</i>             | 8.78 (1.44)                      | 0.00 (0.00)                                                    |
| <i>Ankle Plantar Flexion</i>      | 9.63 (1.02)                      | 0.04 (0.11)                                                    |
| Mean (SD) for lower extremities:  | 7.79 (2.69)                      | 0.16 (0.52)                                                    |
