# Supplementary material
Source: PubMed Central journal article supplement (PMC2944769)
Supplement: NIHMS233820-supplement-02.pdf [file NIHMS233820-supplement-02.pdf]

**Supplemental Table 2.** Serum CK and clinical muscle biopsy findings of 15 subjects.

Immunostaining results are as reported in the clinical pathology report. Antibodies are Dys1 (rod domain), Dys2 (C-terminal domain), and Dys3 (N-terminal domain) (all from Novocastra); and Mab1645 (Chemicon).

| <b>Patient</b> | <b>Serum CK in IU/L (age)</b> | <b>Age at muscle biopsy (years)</b> | <b>Muscle general histopathology</b>                                                                      | <b>Dystrophin immunostaining (IHC = immunohistochemistry; IB = immunoblot)</b>                                  |
|----------------|-------------------------------|-------------------------------------|-----------------------------------------------------------------------------------------------------------|-----------------------------------------------------------------------------------------------------------------|
| 1              | 5603-22000 (16-17)            | 17                                  | variation in size, necrosis and regeneration, endomysial fibrosis                                         | IHC: patchy negative fibers (with Dys1, Dys2, and Dys3)                                                         |
| 2              | 1208-1628 (43)                | -                                   | -                                                                                                         | -                                                                                                               |
| 3              | 30444 (6)                     | -                                   | -                                                                                                         | -                                                                                                               |
| 4              | 283-8954 (12-20)              | 9                                   | variation in size, internal nuclei, necrosis and regeneration, endomysial fibrosis, fat replacement       | IHC: scattered negative/reduced fibers (with Dys2)                                                              |
| 5              | 4239 (27)                     | 27                                  | variation in size, internal nuclei, necrosis and regeneration, endomysial fibrosis, fat replacement       | IHC: patchy negative/reduced fibers (with Dys1, Dys2, and Dys3); IB: reduction (with Dys1), normal size         |
| 6              | 20000 (5)                     | 5                                   | variation in size, necrosis and regeneration, endomysial fibrosis                                         | IHC: no staining with Dys1, Dys2, or Dys3                                                                       |
| 7              | 235-65945 (12)                | 12                                  | inflammation, myopathic grouping, necrosis and regeneration                                               | IHC: patchy reduction; IB: reduction (with Dys2 and Dys3)                                                       |
| 8              | -                             | 7                                   | a few focal chronic inflammatory cells, variation in size, necrosis and regeneration, endomysial fibrosis | IHC: mosaic (MAB 1645): most fibers absent, with clusters of positive fibers.                                   |
| 9              | 512-3180 (8-10)               | 9                                   | variation in size, rare internal nuclei, necrosis and regeneration, endomysial fibrosis                   | -                                                                                                               |
| 10             | 2000-5889 (7)                 | 8                                   | inflammation, internal nuclei, necrosis and regeneration                                                  | IHC: Patchy reduction (with an anti-N-terminus antibody), normal reactivity for the rod and C-terminal epitopes |
| 11             | 423-585 (65-66)               | 66                                  | variation in size, internal nuclei, necrosis and regeneration, endomysial fibrosis                        | IHC: Patchy reduction (with Dys3); IB: reduction (with Dys2 and Dys3, two sizes of dystrophin with Dys1)        |
| 12             | 165 (34)                      | -                                   | -                                                                                                         | -                                                                                                               |
| 13             | 67-108 (19-34)                | -                                   | -                                                                                                         | -                                                                                                               |
| 14             | 500 (40)                      | -                                   | -                                                                                                         | -                                                                                                               |
| 15             | 506 (54)                      | 55                                  | variation in size, endomysial fibrosis                                                                    | IHC: scattered negative/reduced fibers                                                                          |
